# Supplementary material for: Recovery of the polymers formed during thermal cracking ofN-substituted dicarbamates over Fe–Ni/Al2O3
Source: Royal Society of Chemistry journal article supplement (doi:10.1039/c9cy00031c), 2019-01-01
Supplement: c9cy00031c1.pdf [file c9cy00031c1.pdf]

## Electronic Supplementary Information

### Recovery the polymers formed during thermal cracking of N-substituted dicarbamates over Fe-Ni/Al<sub>2</sub>O<sub>3</sub>

Dawei Zhou,<sup>a,b</sup> Peixue Wang,<sup>\*a</sup> Yan Long,<sup>a,b</sup> Yuqing Fei,<sup>a,b</sup> Youquan Deng,<sup>\*a</sup>

<sup>a</sup>State Key Laboratory for Oxo Synthesis and Selective Oxidation, State Key Laboratory of Solid Lubrication, Centre for Green Chemistry and Catalysis, Lanzhou Institute of Chemical Physics, Chinese Academy of Sciences, Lanzhou, 730000, China. E-mail: ydeng@licp.cas.cn; peixuew@licp.cas.cn; Fax: +86-931-4968116; Tel: +86-931-4968116

<sup>b</sup>University of Chinese Academy of Sciences, Beijing 100049, China.

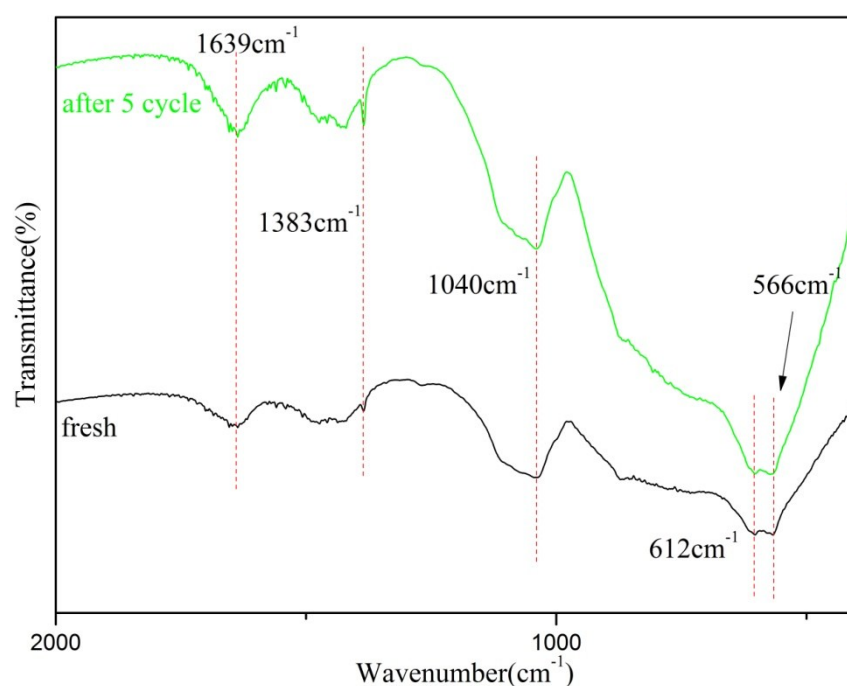

Fig.S1 FT-IR spectra of fresh and after 5 cycle 8%Fe-3%Ni/Al<sub>2</sub>O<sub>3</sub> catalyst.

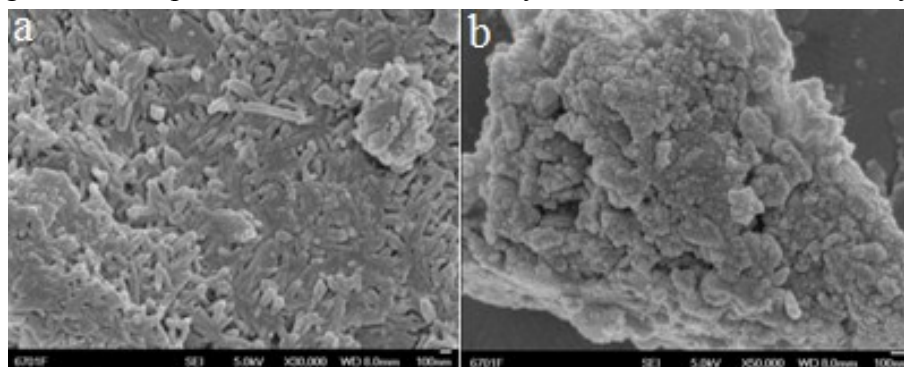

Fig.S2 The SEM images of fresh (a) and after 5 cycle (b) 8% Fe-3%Ni/Al<sub>2</sub>O<sub>3</sub> catalyst.
